# Supplementary material
Source: Springer Nature journal article supplement (https://www.springermedizin.de/resource/supplementary/12990_2005_17_MOESM4_ESM.pdf/9612168)

**a**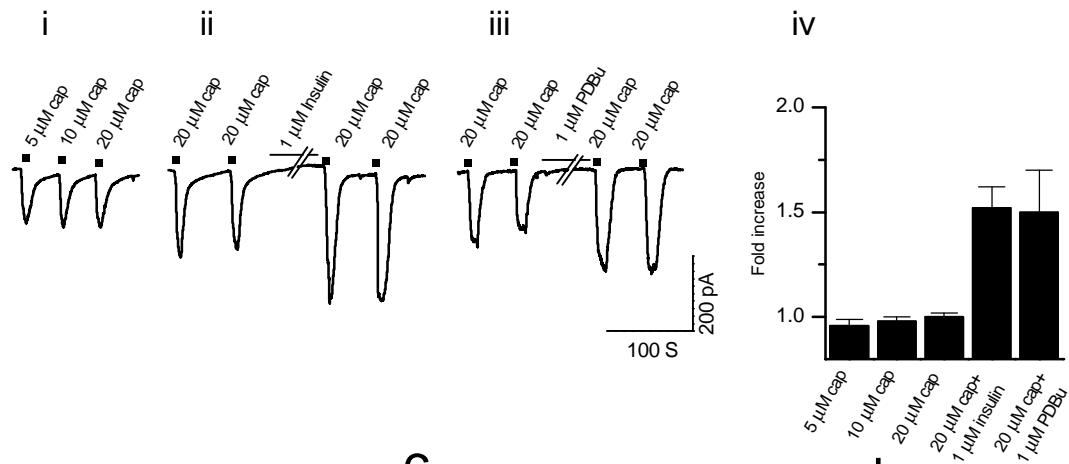**b**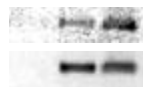

|   |   |   |                    |
|---|---|---|--------------------|
| - | + | + | TRPV1 Transfection |
| - | - | + | Insulin            |

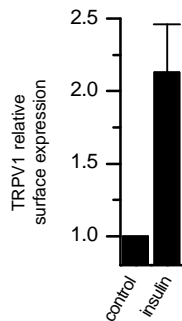**c**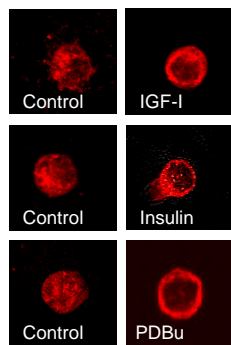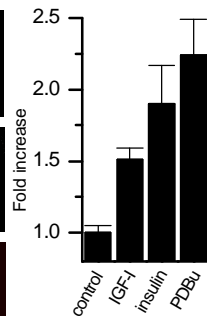**d**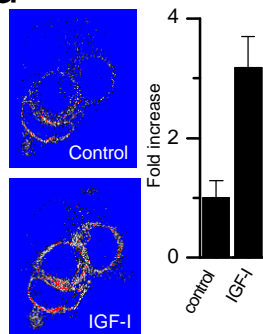

Supplement: MOESM4 [file 9612168]
